# Supplementary material
Source: HighWire-hosted journal article supplement (https://bmjopen.bmj.com/content/12/2/e058634)
Supplement: inline-supplementary-material-1 [file inline-supplementary-material-1.pdf]

Samtykke ExeHeart

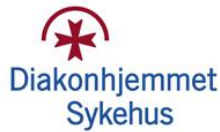

## FORESPØRSEL OM DELTAKELSE I FORSKNINGSPROSJEKTET

## ExeHeart- BEDRE HJERTE OG KARHELSE FOR PASIENTER MED INFLAMMATORISK LEDDSYKDOM

Dette er et spørsmål til deg om å delta i en forskningsstudie der målet er å undersøke tiltak som kan gi en bedre oppfølging av hjerte- og karhelse for deg som har inflammatorisk leddsykdom.

Pasienter med inflammatorisk leddsykdom har som følge av sin sykdom økt risiko for hjerte- og karsykdom. Til tross for dette er hjerte- og karsykdom underdiagnostisert og underbehandlet i denne pasientgruppen. Redusert fysisk form ( $VO_{2peak}$ ) er en sterk og modifiserbar (noe man kan endre) risikofaktor for fremtidig hjerte-karsykdom. Høyintensiv kondisjonstrening kan øke den fysiske formen og potensielt forebygge hjerte-kar sykdom, samt fremme livskvalitet og mestring uten å medføre bivirkninger.

*Hensikten med studien* er å undersøke sammenheng og effekt av høyintensiv kondisjonstrening på fysisk form ( $VO_{2peak}$ ), hjertekar-helse og sykdomsaktivitet hos pasienter med inflammatorisk leddsykdom. Treningen vil foregå på et fysikalsk institutt der vi også vil undersøke om pasienter og fysioterapeuter gjennomfører treningsprogrammet i henhold til protokollen. Videre vil vi undersøke om en enkel kondis-kalkulator er egnet til å fange opp endringer i fysisk form. I tillegg vil noen deltagere bli intervjuet med fokus på hvordan de har erfart en slik type trening.

Resultatet av studien kan gi verdifull informasjon om effekten av trening på risikofaktorer for hjerte- og karsykdom hos pasienter med inflammatorisk leddsykdom og om den type trening er mulig å gjennomføre i primærhelsetjenesten. Videre kan gyldigheten til kondis-kalkulator ha betydning for om slike målemetoder bør tas i bruk i klinisk praksis.

Vi ber om din deltakelse i prosjektet, så fremt du oppfyller følgende kriterier: Du må ha en inflammatorisk leddsykdom (revmatisk sykdom) som er diagnostisert av lege. I tillegg må du være i alderen 18-70 år og snakke norsk eller engelsk. Videre må du kunne gå sammenhengende i 15 minutter eller mer. Du kan ikke ha hatt operasjoner eller skader i ben/føtter i løpet av de 12 siste månedene. Du kan heller ikke delta dersom du har nevrologisk sykdom eller en hjerte-kar sykdom som innebærer at du ikke kan trene kondisjon med maksimal innsats. Dersom du har trent kondisjon med høy intensitet regelmessig 1 gang i uken eller mer de siste tre månedene, kan du ikke delta.

Diakonhjemmet sykehus er ansvarlig for studien.

## HVA INNEBÆRER PROSJEKTET?

Deltakelse i prosjektet innebærer at du gjennomfører undersøkelser på Diakonhjemmet sykehus tre ganger i løpet av ca 6 måneder. Etter den første runden med undersøkelser blir du trukket til å delta i treningsgruppe eller kontrollgruppe. Dersom du blir trukket ut til å delta i treningsgruppen, vil du få mulighet til å trene hos en fysioterapeut på et fysikalsk institutt i Oslo-området to ganger i uken i 12 uker. I tillegg ønsker vi at du etter fire uker også gjennomfører en treningsøkt på egenhånd hver uke. Treningen tilpasses til den enkelte og vil inneholde kondisjonstrening der du blir tydelig svett og andpusten. Hver treningsøkt varer i ca 45 minutter inkludert oppvarming og nedtrapping. Treningsøktene er lagt opp som intervalltrening- det vil si at du veksler mellom å jobbe med høy intensitet i 3-4 minutter og lav intensitet i 2-3 minutter. Treningen kan gjennomføres på sykkel, ellipsemaskin, gå i motbakke eller jogge/løpe.

## Samtykke ExeHeart

Dersom du blir trukket til kontrollgruppe, vil du få standard behandling og oppfølging ved Diakonhjemmet sykehus. I tillegg vil du få tilbud om en veiledet treningsøkt hos fysioterapeut etter at prosjektet er gjennomført. Uavhengig av hvilken gruppe du havner i, vil du fortsette med vanlig oppfølging ved Revmatologisk poliklinikk og Forebyggende Hjerne-Revma klinikk.

**Følgende tester og undersøkelser gjennomføres ved start av studien:**

Som en del av undersøkelsen ved Diakonhjemmet vil det innhentes informasjon om undersøkelser du nylig har gjennomført ved Forebyggende Hjerne-Revma klinikk. Det gjelder informasjon fra spørreskjema om risikofaktorer for hjerte- og karsykdom, blodprøvesvar og resultat av undersøkelser (EKG, blodtrykk, måling av arteriell stivhet og ultralyd av halskar) som vil hentes ut fra din journal.

I tillegg vil du bli bedt om å gjennomgå:

*Spørreskjema* der du blir bedt om å oppgi informasjon om personlige forhold (alder, kjønn, utdanning, arbeid, sivilstatus), treningsvaner samt barrierer og mestring av fysisk aktivitet. Du blir også bedt om å svare på spørsmål om bruk av helsetjenester, medikamentbruk, smerte, utmattelse, sykdomsaktivitet, sykdomsvarighet, fysisk funksjon, psykisk funksjon og mestring. Det er beregnet at det tar ca. 10-15 minutter å besvare spørreskjemaene.

*Undersøkelse av sykdomsaktivitet* der vi registrerer vonde og hovne ledd.

*Måling av vekt, høyde og midjeomkrets og kroppssammensetning.*

*Hvilepuls* som du måler selv om morgenen på testdagen. Hvilepuls vil også måles mens du ligger i ro på en benk.

*Test av lungefunksjon og fysisk form (VO<sub>2peak</sub>)- CPET*

Først gjennomfører du pustepøver for å måle lungefunksjon (spirometri). Deretter går du på tredemølle mens vi gradvis øker stigning og etter hvert hastighet. Testen tar vanligvis 8-12 minutter. Du puster gjennom en maske knyttet til et apparat som gir oss objektive mål på hvor hardt du tar i. På brystet har du lapper som er koblet til en EKG-maskin, slik at vi kan følge med på hjerterytmen din underveis. Du har også et blodtryksapparat koblet med mansjett til en arm. Etter gjennomført test vil det bli tatt en liten blodprøve fra fingeren for å måle nivå av laktat (melkesyre) i blodet.

De siste 48 timene før kondisjonstest må du avstå fra all krevende fysisk aktivitet (trening) og alkohol. Koffeinholdig drikke og evt. røyk kan inntas frem til fire timer før test. De siste to timene før test av kondisjon bør du ikke spise, men du kan drikke vann.

**Følgende tester og undersøkelser gjennomføres etter 12 uker og 6 måneder:**

Ved oppfølging etter 12 uker og 6 måneder bes du ta blodprøver i forkant av konsultasjonen.

For øvrig vil du bli bedt om å gjennomgå de samme undersøkelsene (*sykdomsaktivitet, mål av vekt, høyde og midjeomkrets, kroppssammensetning, hvilepuls, blodtrykk, arteriell stivhet og test av fysisk form/CPET*) og svare på det samme spørreskjemaet som ved start av studien.

Etter fullført trening vil deltakere i treningsgruppen få tilsendt et spørreskjema der vi spør om hvordan treningen ble gjennomført og hvordan den enkelte deltaker opplevde treningen.

## Samtykke ExeHeart

Vi vil gjennomføre intervjuer med noen av deltakerne i treningsgruppen. Hensikten med intervjuene er å undersøke faktorer som fremmet og hemmet gjennomføring av treningsprogrammet. Intervjuet vil foregå over fysisk eller som videokonsultasjon og vil vare i ca 45-60 minutter.

Alle opplysninger vil bli aidentifisert og behandlet konfidensielt. Det er kun de involverte i prosjektet som vil ha tilgang til opplysningene. Masterstudenter involvert i prosjektet vil kunne få tilgang til data gjennom Databehandleravtalen ved Diakonhjemmet sykehus.

### MULIGE FORDELER OG ULEMPER

Mange mosjonister ønsker i dag å undersøke sin fysiske form med hjelp av testene vi skal gjøre i dette prosjektet. Hvis du deltar i denne studien, vil du få objektiv informasjon om din fysiske form sammenliknet med den friske befolkningen, noe som kan hjelpe deg til videre treningsmotivasjon. Deltakelse i prosjektet vil kreve en del tid og oppmerksomhet. Test av fysisk form innebærer at du skal gå/løpe til utmattelse og vil oppleves som fysisk anstrengende. Blodprøven som tas i fingeren etter endt kondisjonstest vil oppleves som et lite stikk. Dersom du havner i treningsgruppen, vil du få veiledet trening hos en fysioterapeut i 12 uker. Dersom du havner i kontrollgruppen, vil du få tilbud om en time hos fysioterapeut etter at studien er avsluttet.

### FRIVILLIG DELTAKELSE OG MULIGHET FOR Å TREKKE SITT SAMTYKKE

Det er frivillig å delta i prosjektet. Dersom du ønsker å delta, undertegner du samtykkeerklæringen på siste side. Du kan når som helst og uten å oppgi noen grunn trekke ditt samtykke. Dette vil ikke få konsekvenser for din videre behandling. Dersom du trekker deg fra prosjektet, kan du kreve å få slettet innsamlede prøver og opplysninger, med mindre opplysningene allerede er inngått i analyser eller brukt i vitenskapelige publikasjoner. Prosjektledere er professor Hanne Dagfinrud og seniorforsker Anne Therese Tvetter. Dersom du senere ønsker å trekke deg eller har spørsmål til prosjektet, kan du kontakte:

Prosjektmedarbeider og PhD stipendiat Kristine Røren Nordén, mail: [kristineroren.norden@diakonsyk.no](mailto:kristineroren.norden@diakonsyk.no), tlf: 92043801.

Seniorforsker Anne Therese Tvetter, mail: [annetherese.tvetter@diakonsyk.no](mailto:annetherese.tvetter@diakonsyk.no), tlf: 91115550

### HVA SKJER MED INFORMASJONEN OM DEG?

Informasjonen som registreres om deg skal kun brukes slik som beskrevet i hensikten med studien. Du har rett til innsyn i hvilke opplysninger som er registrert om deg og rett til å få korrigeret eventuelle feil i de opplysningene som er registrert.

Alle opplysningene vil bli behandlet uten navn og fødselsnummer eller andre direkte gjenkjenner opplysninger. En kode knytter deg til dine opplysninger gjennom en navneliste. Alle som får innsyn i informasjonen om deg har taushetsplikt. Resultatene fra studien vil offentliggjøres i internasjonale, fagfelleverderte tidsskrift. Det vil ikke være mulig å identifisere deg i resultatene av studien når disse publiseres. Du vil få tilsendt artiklene dersom du ønsker det.

Prosjektleder har ansvar for den daglige driften av forskningsprosjektet og at opplysninger om deg blir behandlet på en sikker måte. Opplysningene som registreres om deg skal kun brukes slik som beskrevet under formålet med prosjektet, og planlegges brukt til 2029. Eventuelle utvidelser i bruk og oppbevaringstid kan kun skje etter godkjenning fra regional etiske komité og andre relevante myndigheter.

## Samtykke ExeHeart

## FORSIKRING

Deltakere i studien er forsikret gjennom pasientskadeloven.

## GODKJENNING

Prosjektet er godkjent av Regional komite for medisinsk og helsefaglig forskningsetikk, REK ref.nr 201227.

## SAMTYKKE TIL DELTAKELSE I PROSJEKTET

Hvis du ønsker å delta i prosjektet ber vi deg underskrive og oppgi telefonnummer på vedlagt samtykkeskjema.

## JEG ER VILLIG TIL Å DELTA I PROSJEKTET

Jeg har lest informasjonskrivet og samtykker til å delta i forskningsprosjektet.

**Signatur:**

**Sted og dato:**

-----

-----

**Fornavn (blokkbokstaver):**

**Etternavn (blokkbokstaver):**

-----

-----

**Mobiltelefonnummer:**

**Epost adresse:**

-----

-----

Jeg godtar å bli kontaktet for deltagelse i intervju etter fullført treningsintervensjon. (Du kan delta i ExeHeart selv om du ikke deltar i intervjuene)

Jeg bekrefter å ha gitt informasjon om prosjektet

-----  
Sted og dato

-----  
Signatur

-----  
Rolle i prosjektet
